# Supplementary material
Source: publisher site journal article supplement (https://www.spandidos-publications.com/2075/downloadSupplementary)
Supplement: Supplementary file 1 [file downloadSupplementary]

Table SI. Number of deaths in the sham and model groups following the establishment of spinal cord injury model rats.

| A, Sham group             |                   |                  |                                                            |         |
|---------------------------|-------------------|------------------|------------------------------------------------------------|---------|
| Author, year              | Days post-surgery | Number of deaths | Reason for death                                           | (Refs.) |
| Nan <i>et al</i> , 2010   | 1-3               | 2                | Pulmonary edema                                            | (1)     |
|                           | 4-7               | 0                | n/a                                                        |         |
| Huang <i>et al</i> , 2012 | 8-14              | 1                | Pulmonary infection                                        | (2)     |
|                           | 15-30             | 0                | n/a                                                        |         |
|                           | 31-56             | 0                | n/a                                                        |         |
| B, Model group            |                   |                  |                                                            |         |
| Author, year              | Days post-surgery | Number of deaths | Reason for death                                           | (Refs.) |
| Nan <i>et al</i> , 2010   | 1-3               | 2                | Pulmonary congestion (n=1) or pulmonary edema (n=1)        | (1)     |
|                           | 4-7               | 0                | n/a                                                        |         |
| Huang <i>et al</i> , 2012 | 8-14              | 3                | Pulmonary infection (n=2) or urinary tract infection (n=1) | (2)     |
| Huang <i>et al</i> , 2012 | 15-30             | 1                | Pulmonary infection                                        | (2)     |
|                           | 31-56             | 0                | n/a                                                        |         |

n/a, not applicable.

## References

1. Nan GX, Qin JQ and Liao WH: Analysis of death cause in rats with spinal cord injury. *Chin J Traumatol* 11: 1040-1042, 2010.
2. Huang H, Zhang X, Chen HQ, Gu J, Ye SL and Liao HY: Establishment of rat model of acute spinal cord injury and analysis of death causes. *Hainan Med J* 23: 23-25, 2012.
